# Supplementary material for: The gut microbiome regulates astrocyte reaction to Aβ amyloidosis through microglial dependent and independent mechanisms
Source: PubMed Central journal article supplement (PMC10324210; doi:10.1186/s13024-023-00635-2), 2023-07-06

### 9-week M VHL vs M ABX

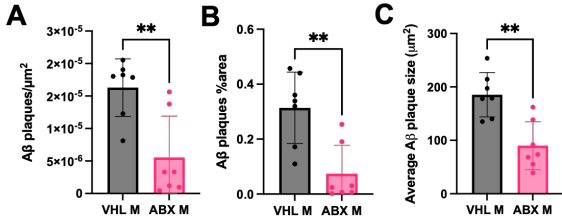

### 9-week F VHL vs F ABX

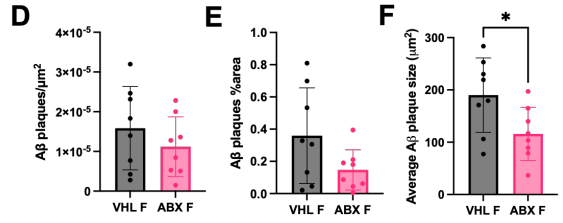

### 9-week M ABX vs M ABX+ FMT

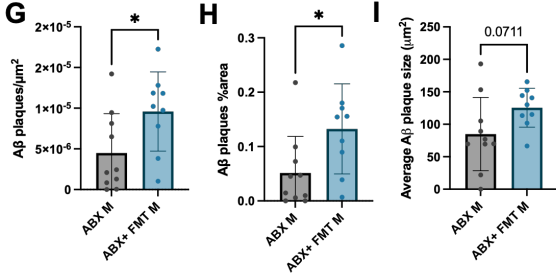

### 9-week M SPF vs M GF

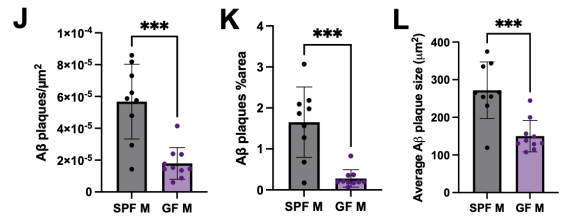

### 3-month M VHL vs M ABX

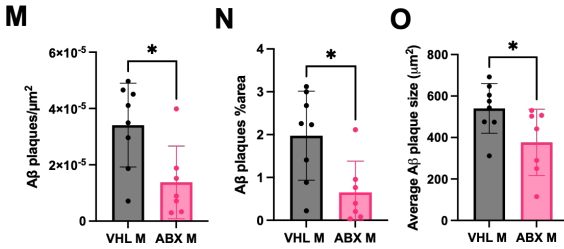

### 3-month M PLX vs M PLX + ABX

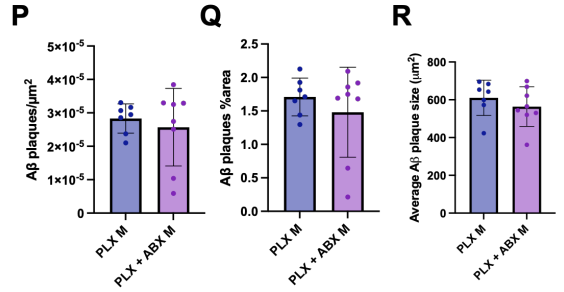

Supplement: 13024_2023_635_MOESM4_ESM.pdf [file 13024_2023_635_MOESM4_ESM.pdf]
