# Supplementary material for: The gut microbiome regulates astrocyte reaction to Aβ amyloidosis through microglial dependent and independent mechanisms
Source: PubMed Central journal article supplement (PMC10324210; doi:10.1186/s13024-023-00635-2), 2023-07-06

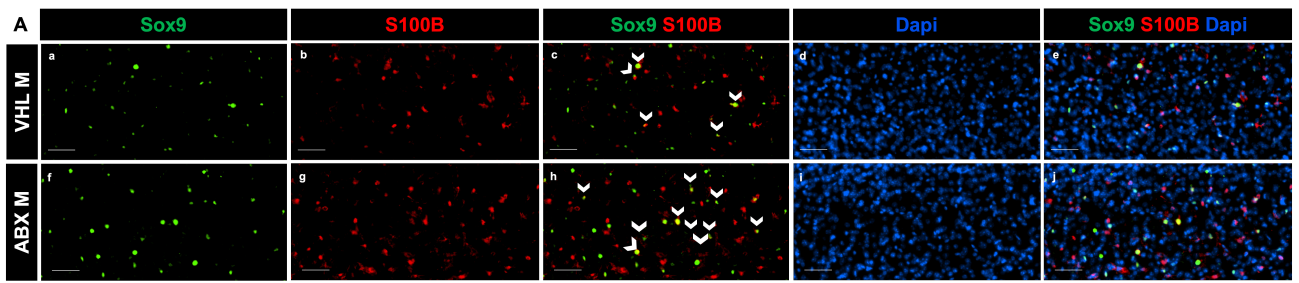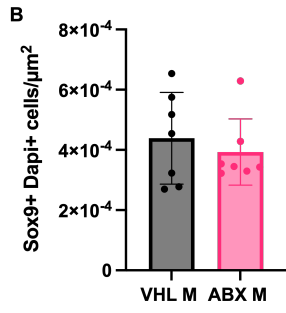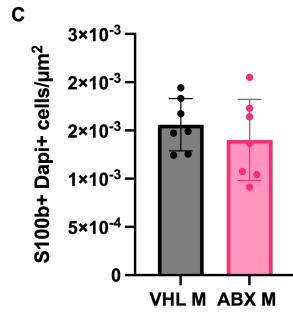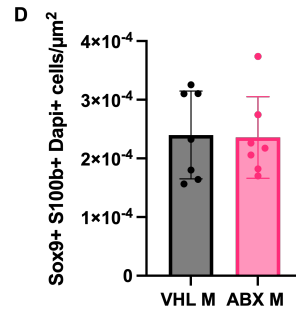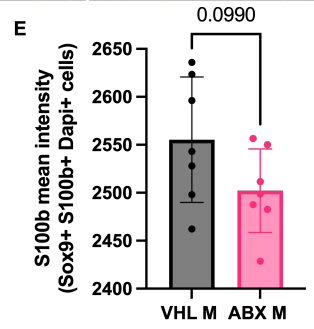

Supplement: 13024_2023_635_MOESM7_ESM.pdf [file 13024_2023_635_MOESM7_ESM.pdf]
