# Supplementary material for: The gut microbiome regulates astrocyte reaction to Aβ amyloidosis through microglial dependent and independent mechanisms
Source: Springer Nature journal article supplement (doi:10.1186/s13024-023-00635-2), 2023-07-06

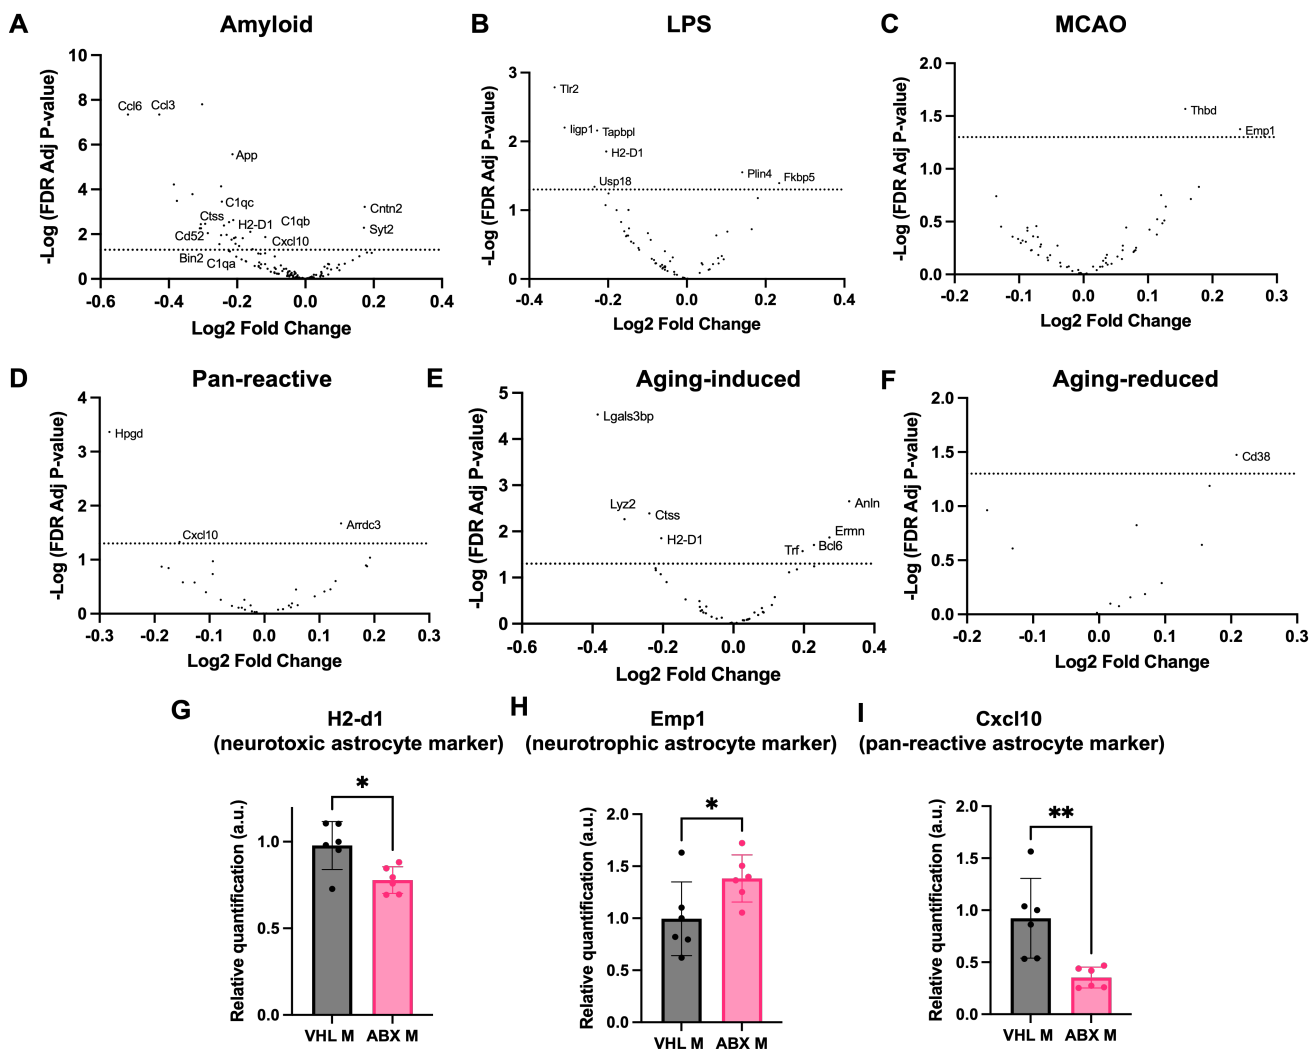

Supplement: MOESM9 [file 13024_2023_635_MOESM9_ESM.pdf › 13024_2023_635_MOESM9_ESM.pdf]
